# Supplementary material for: Sam68 functions as a transcriptional coactivator of the p53 tumor suppressor
Source: PubMed Central journal article supplement — Nucleic Acids Res. 2016 Jun 30;44(18):8726–41. doi: 10.1093/nar/gkw582 (PMC5062974; doi:10.1093/nar/gkw582), 2016-06-30
Supplement: supp_gkw582_nar-00846-x-2016-File003.pdf [file supp_gkw582_nar-00846-x-2016-File003.pdf]

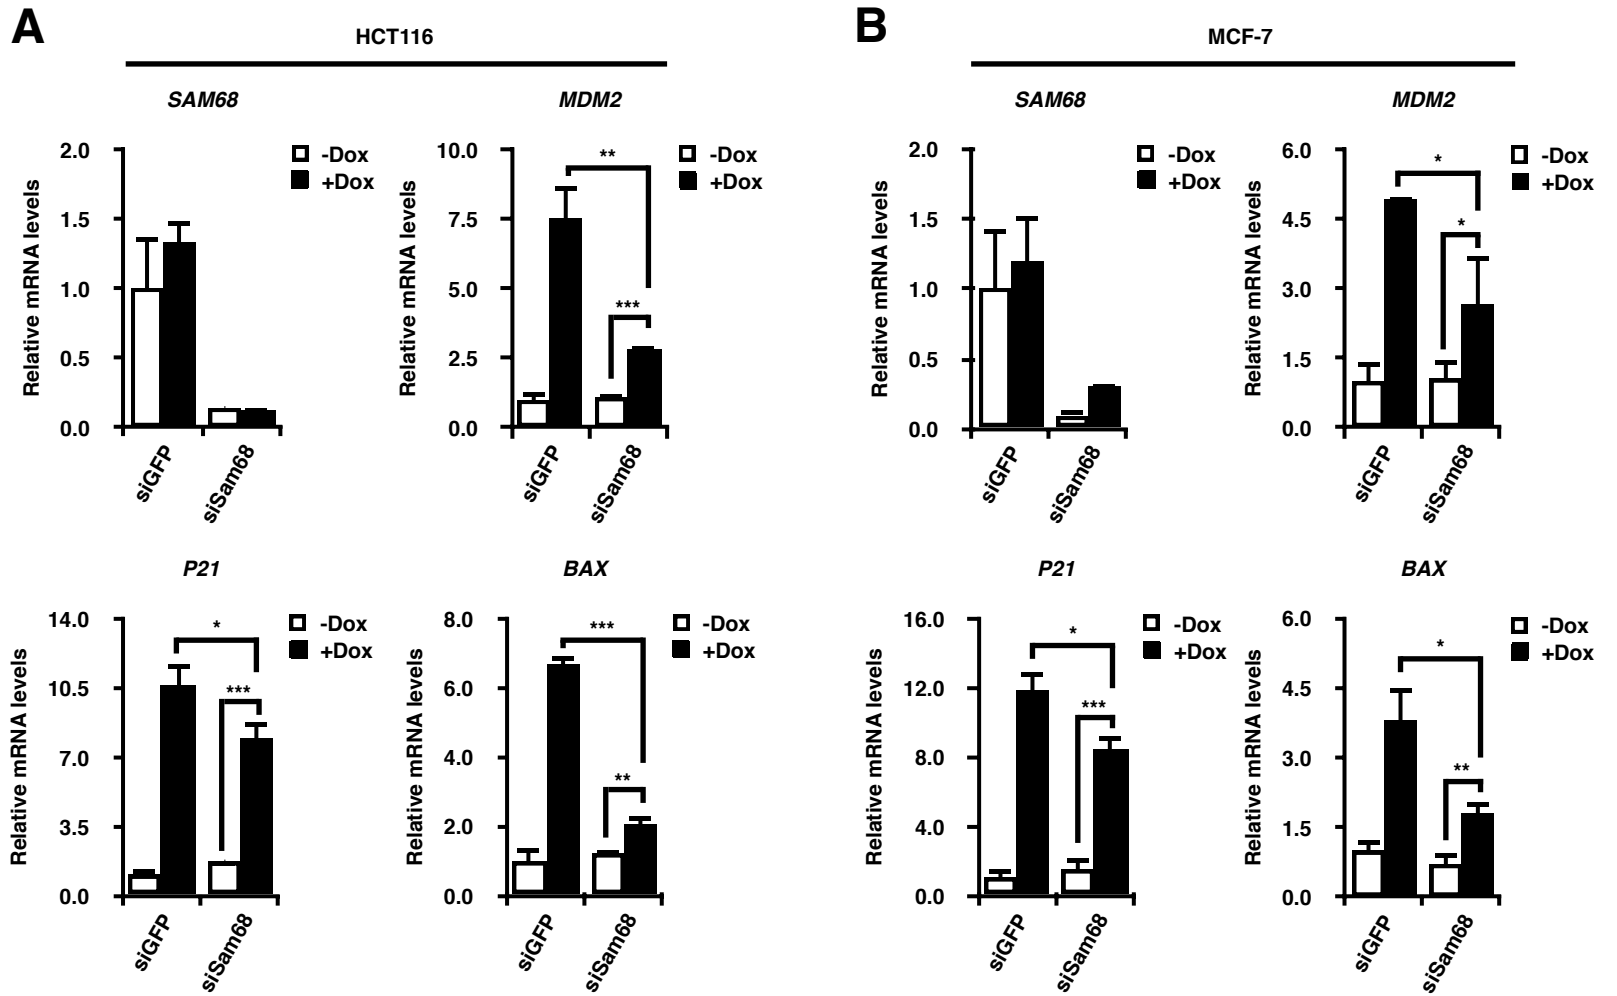

Li and Richard, Figure S2

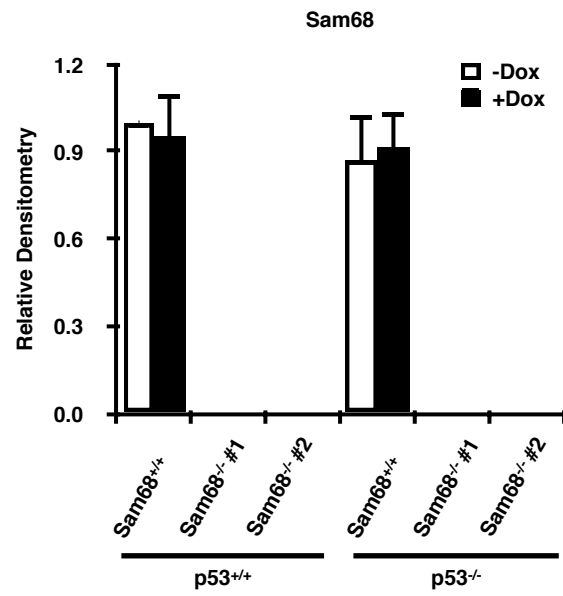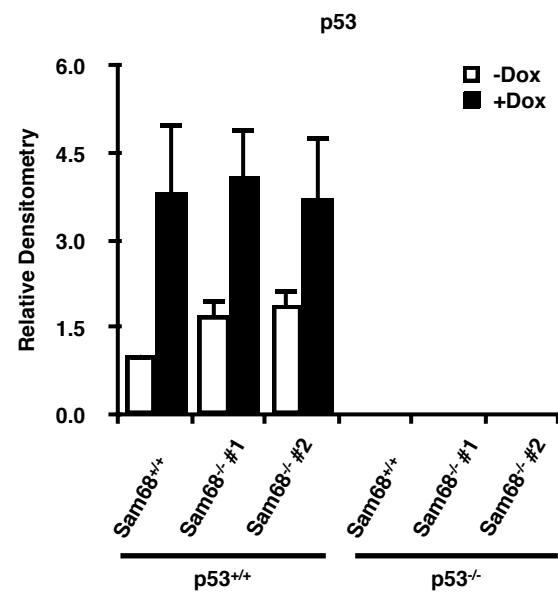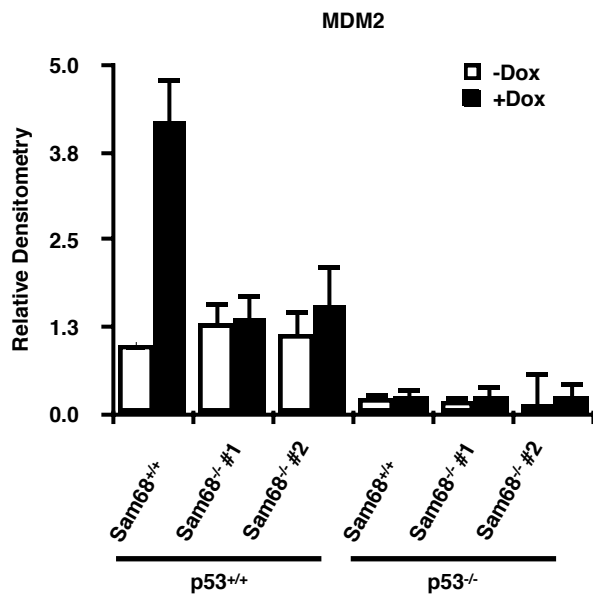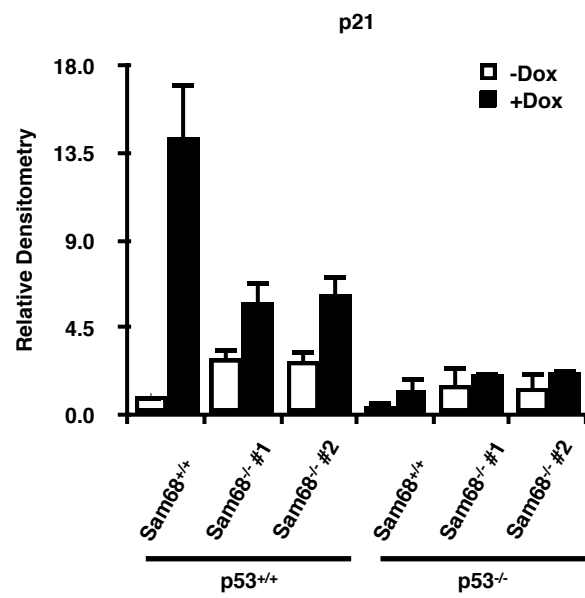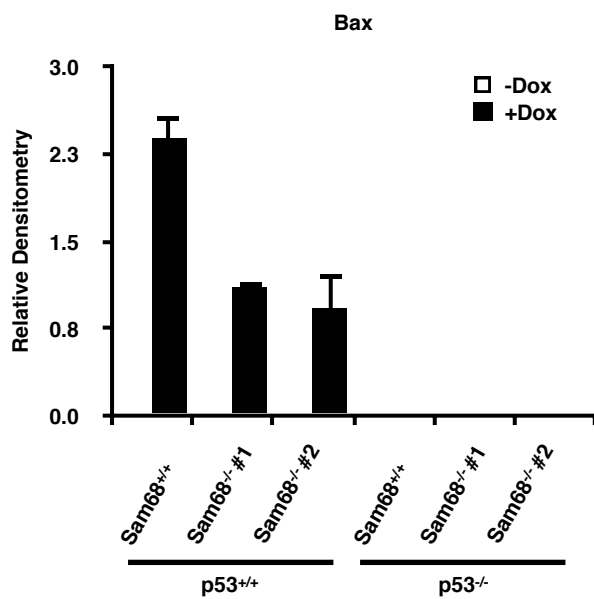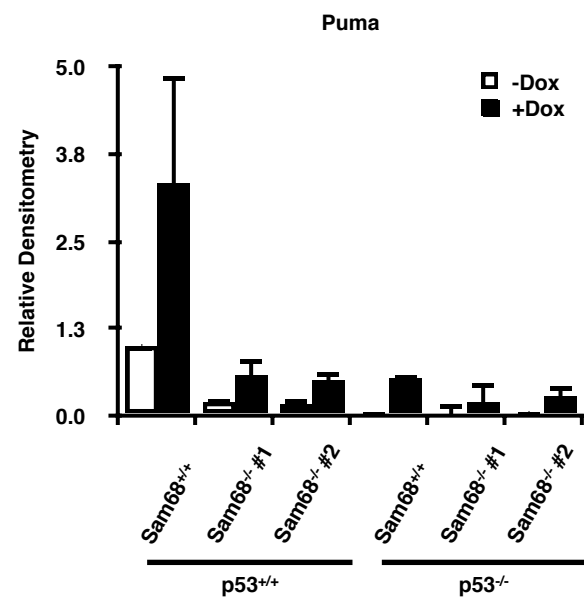

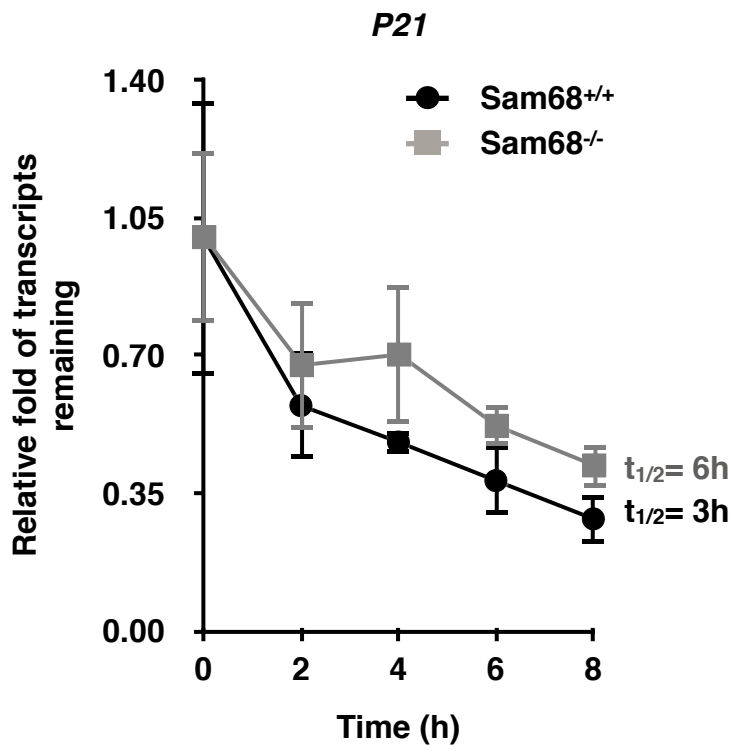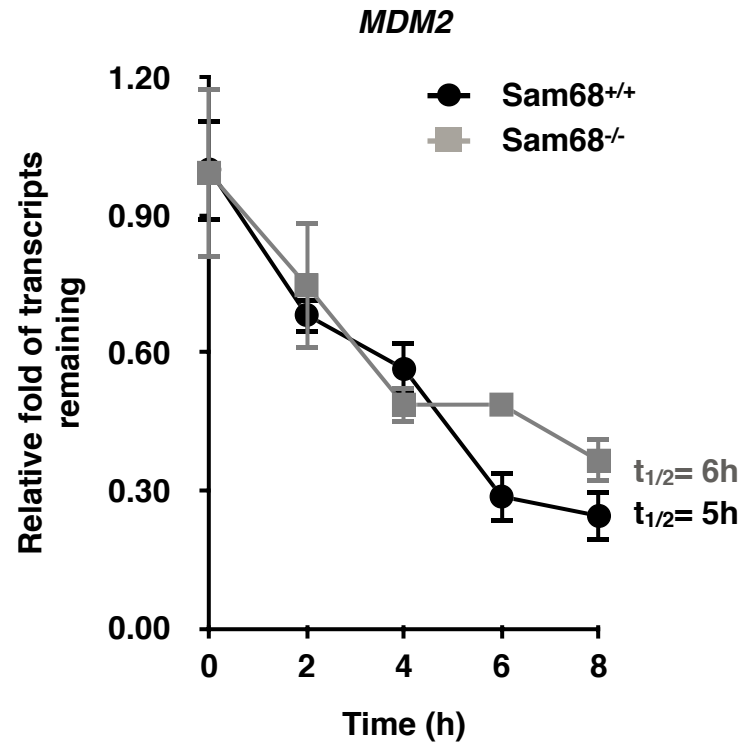

Li and Richard, Figure S4

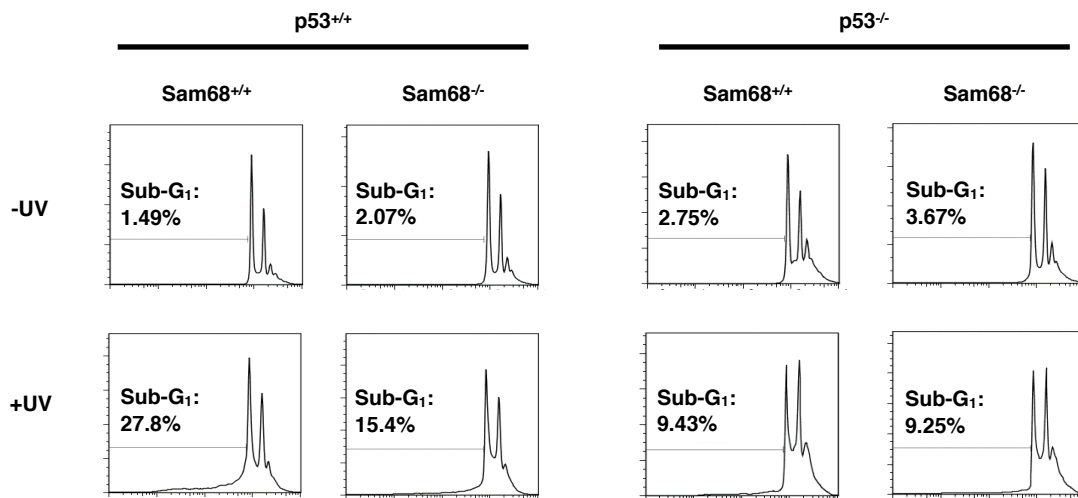

Li and Richard, Figure S5

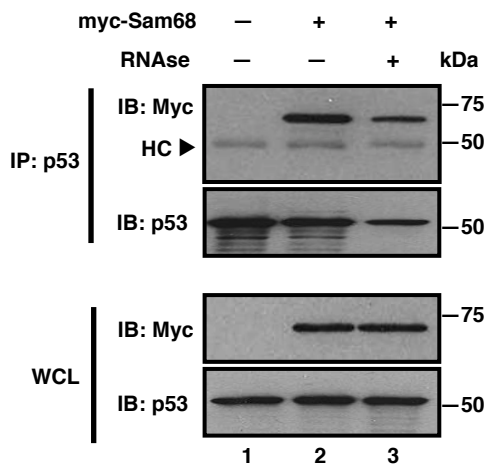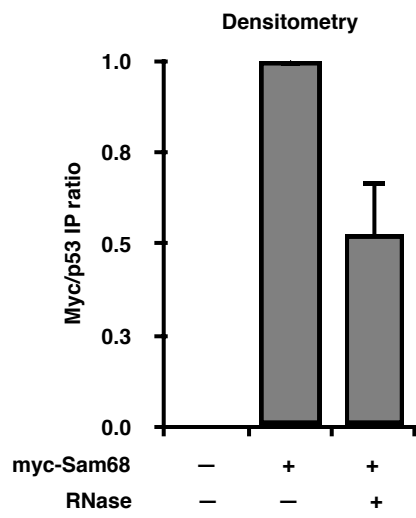

**A**

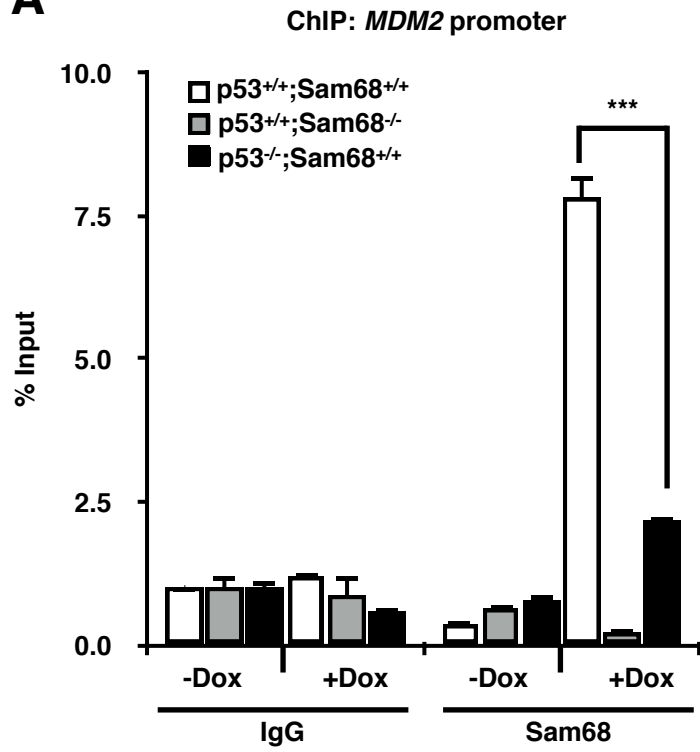

**B**

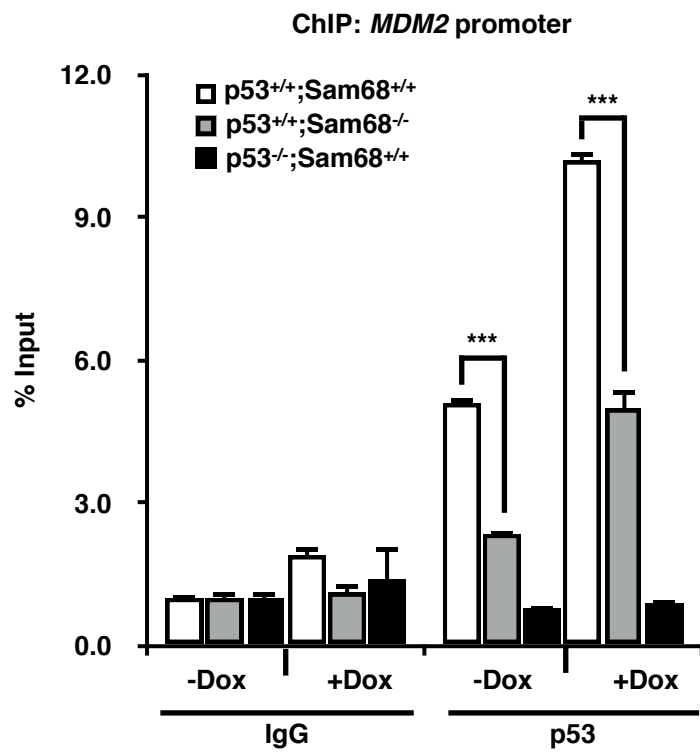

Li and Richard, Table S1

| Primers             |             |                         |                          |
|---------------------|-------------|-------------------------|--------------------------|
| Gene                | Application | Forward (5'-3')         | Reverse (5'-3')          |
| <i>P21</i>          | qPCR        | TGCCGAAGTCAGTTCCTTGT    | GTTCTGACATGGCGCCTCC      |
|                     | ChIP-qPCR   | AGCAGGCTGTGGCTCTGATT    | CAAATAGCCACCAGCCTCTTCT   |
| <i>PUMA</i>         | qPCR        | GACCTCAACGCACAGTACGA    | GAGATTGTACAGGACCCTCCA    |
|                     | ChIP-qPCR   | GGTTGACTCAGCTTTTCCTCTTG | GGAAAATGCATGGTTTAAATAGCC |
| <i>BAX</i>          | qPCR        | GGGTTGTCGCCCTTTTCTAC    | GGAGGAAGTCCAATGTCCAG     |
| <i>MDM2</i>         | qPCR        | AGGAGATTTGTTTGGCGTGC    | TGAGTCCGATGATTCCTGCTG    |
|                     | ChIP-qPCR   | GGTTGACTCAGCTTTTCCTCTTG | GGAAAATGCATGGTTTAAATAGCC |
| <i>SAM68</i>        | qPCR        | CTCCTGCTAGGCCAGTGAA     | TTGTGGGTAAAGCAACAGGA     |
|                     | PCR         | TG TTCAGTCTGGCTTGTGAGT  | CACTGCAAGAGAAGAGGGCA     |
| <i>PR-lincRNA-1</i> | qPCR        | AAGTCACTTGCCTGAGTTTGG   | CTGCTGGGGCTCAACTGT       |
| <i>lincRNA-p21</i>  | qPCR        | GGGTGGCTCACTCTTCTGGC    | TGGCCTTGCCCGGGCTTGTC     |
| <i>GAPDH</i>        | qPCR        | GACAGTCAGCCGCATCTTCT    | GCGCCCAATACGACCAAAT      |
| <i>18S</i>          | qPCR        | GCAGGCGCGGGTAACC        | AAGCTTATGACCCGCACTTACTG  |
| <i>ACTB</i>         | qPCR        | ACCACACCTTCTACAATGAGC   | GATAGCACAGCCTGGATAGC     |

**Li and Richard, Table S2**

|                   | <b>Sam68</b>    | <b>Deletion (bp)</b> |
|-------------------|-----------------|----------------------|
| <b>HCT116 p53</b> | <b>clone #1</b> | <b>899</b>           |
|                   | <b>clone #2</b> | <b>757</b>           |
| <b>HCT116 p53</b> | <b>clone #1</b> | <b>515</b>           |
|                   | <b>clone #2</b> | <b>877</b>           |



## SUPPLEMENTARY DATA

### SUPPLEMENTAL TABLE AND FIGURE LEGENDS

#### **Figure S1. RNAi-depletion of Sam68 attenuates upregulation of p53 targets in response to DNA damage.**

(A) RT-qPCR analysis of *SAM68* and direct p53 targets (*MDM2*, *P21*, *BAX*) in p53 wild type HCT116 or

(B) MCF-7 cells. Cells were either untreated or treated with 1  $\mu$ M of doxorubicin for 24 h before RNA extraction. Expression levels were normalized to *GAPDH*. Data are represented as mean  $\pm$  S.D. from 3 independent experiments done in biological triplicates. Statistical significance was calculated with student's *t*-test (\* $p \leq 0.05$ , \*\* $p \leq 0.005$ , \*\*\* $p \leq 0.0005$ ).

#### **Figure S2. Densitometry quantification.**

Quantification of p53, Sam68, and p53 targets (*MDM2*, *p21*, *Bax*, *Puma*) in HCT116 cells untreated (-Dox) or treated with doxorubicin (+Dox). Densitometry analysis was performed using ImageJ. Expression levels were normalized to loading control. Data are represented as mean  $\pm$  S.D. from 3 independent experiments.

#### **Figure S3. Sam68 selectively regulates *P21* mRNA stability.**

Transcript stability was assessed in *Sam68*<sup>+/+</sup> or *Sam68*<sup>-/-</sup> HCT116 cells treated with actinomycin D (5  $\mu$ g/ mL). mRNA was extracted at the indicated time points and transcripts were quantified by qPCR using primers specific for *P21* and *MDM2* which were normalized to *GAPDH* expression levels. Transcript half-life ( $t_{1/2}$ ) was calculated based on the relative fold of mRNA remaining compared to initial levels (0 h). Data, replicated in 3 independent experiments, are represented as mean  $\pm$  S.D. of technical triplicates. Statistical significance was calculated with student's *t*-test (\* $p \leq 0.05$ , \*\* $p \leq 0.005$ , \*\*\* $p \leq 0.0005$ ).

**Figure S4. Sam68-deficiency reduces p53-mediated apoptosis.**

Cell death was analyzed by flow cytometry in untreated (-UV) and treated (+UV, 60 J/m<sup>2</sup>) isogenic HCT116 cells. Total apoptosis was assessed by measuring sub-G<sub>1</sub> cells after PI staining, and quantification was done using FlowJo software.

**Figure S5. RNA enhances the interaction between Sam68 and p53.**

p53 immunoprecipitation in doxorubicin-treated HCT116 cells transiently transfected with either empty vector (-) or myc-Sam68 (+). Lysates were untreated (-) or treated (+) with RNase A (1mg/ mL) at 37°C prior to immunoprecipitation. Densitometry analysis (bottom) was performed using ImageJ. Levels were calculated as the ratio of total immunoprecipitated myc-Sam68 over total immunoprecipitated p53, and then normalized to the positive control (myc-Sam68 -RNase). Data are represented as mean ± S.D. from 3 independent experiments. IP, immunoprecipitation; IB, immunoblot; WCL, whole cell lysate; HC, heavy chain.

**Figure S6. Sam68 and p53 are recruited to the *MDM2* promoter in an interdependent manner.**

(A and B) ChIP-qPCR analysis of HCT116 cells. Cell lysates from untreated and doxorubicin-treated cells were immunoprecipitated with either nonspecific IgG, p53- or Sam68-specific antibodies. Precipitated DNA was quantified by qPCR with primers specific for p53-response elements of the *MDM2* promoter. Data, replicated in 3 independent experiments, are represented as mean ± S.D. of technical triplicates. Statistical significance was calculated with student's *t*-test (\* $p \leq 0.05$ , \*\* $p \leq 0.005$ , \*\*\* $p \leq 0.0005$ ).

**Table S1. List of primers.**

**Table S2. HCT116 Sam68<sup>-/-</sup> clones.**
